# Supplementary material for: One-step solvothermal synthesis of Al-promoted Fe3O4 magnetic catalysts for the selective oxidation of benzyl alcohol to benzaldehyde with H2O2 in water
Source: Royal Society of Chemistry journal article supplement (doi:10.1039/c6ra23019a), 2016-01-01
Supplement: c6ra23019a1.pdf [file c6ra23019a1.pdf]

## Supporting Information

### One-step solvothermal synthesis of Al-promoted Fe<sub>3</sub>O<sub>4</sub> magnetic catalysts for selective oxidation of benzyl alcohol to benzaldehyde with H<sub>2</sub>O<sub>2</sub> in water

Leisha Xiong, Rong Chen and Fengxi Chen\*

School of Chemistry and Environmental Engineering, Wuhan Institute of  
Technology, Wuhan, 430073, PR China

(E-mail address: fxchen@wit.edu.cn)

**Table S1** Synthesis of Fe<sub>3</sub>O<sub>4</sub>-AIP with varying Al contents at 198 °C for 24h

| Al content<br>(wt%) | Al source <sup>a</sup><br>(mL) | FeCl <sub>3</sub> ·6H <sub>2</sub> O<br>(g) | NaOAc<br>(g) | MEG<br>(mL) |
|---------------------|--------------------------------|---------------------------------------------|--------------|-------------|
| 0.08                | 0.1                            | 3.703                                       | 3.601        | 9.0         |
| 0.25                | 0.3                            | 3.703                                       | 3.601        | 9.0         |
| 0.42                | 0.5                            | 3.703                                       | 3.601        | 9.0         |
| 1.42                | 2.0                            | 3.703                                       | 3.601        | 9.0         |
| 3.15                | 8.0                            | 3.703                                       | 3.601        | 9.0         |
| 5.53                | 12.0                           | 3.703                                       | 3.601        | 9.0         |

<sup>a</sup> The aluminium source was the saturated solution of aluminium isopropoxide in isopropanol.

**Table S2** EDX analysis of Fe<sub>3</sub>O<sub>4</sub>-AIP-5.53%

| Element | Content (wt%) |        |        |        | Average       | Average         |
|---------|---------------|--------|--------|--------|---------------|-----------------|
|         | Area 1        | Area 2 | Area 3 | Area 4 | content (wt%) | content (atom%) |
| Fe      | 54.04         | 44.37  | 55.39  | 53.19  | 51.75         | 24.04           |
| O       | 40.07         | 40.28  | 38.79  | 40.54  | 39.92         | 64.73           |
| Al      | 5.90          | 4.57   | 5.82   | 5.81   | 5.53          | 5.32            |
| C       | -             | 10.78  | -      | -      | 2.70          | 5.83            |
| Cl      | -             | -      | -      | 0.46   | 0.12          | 0.09            |

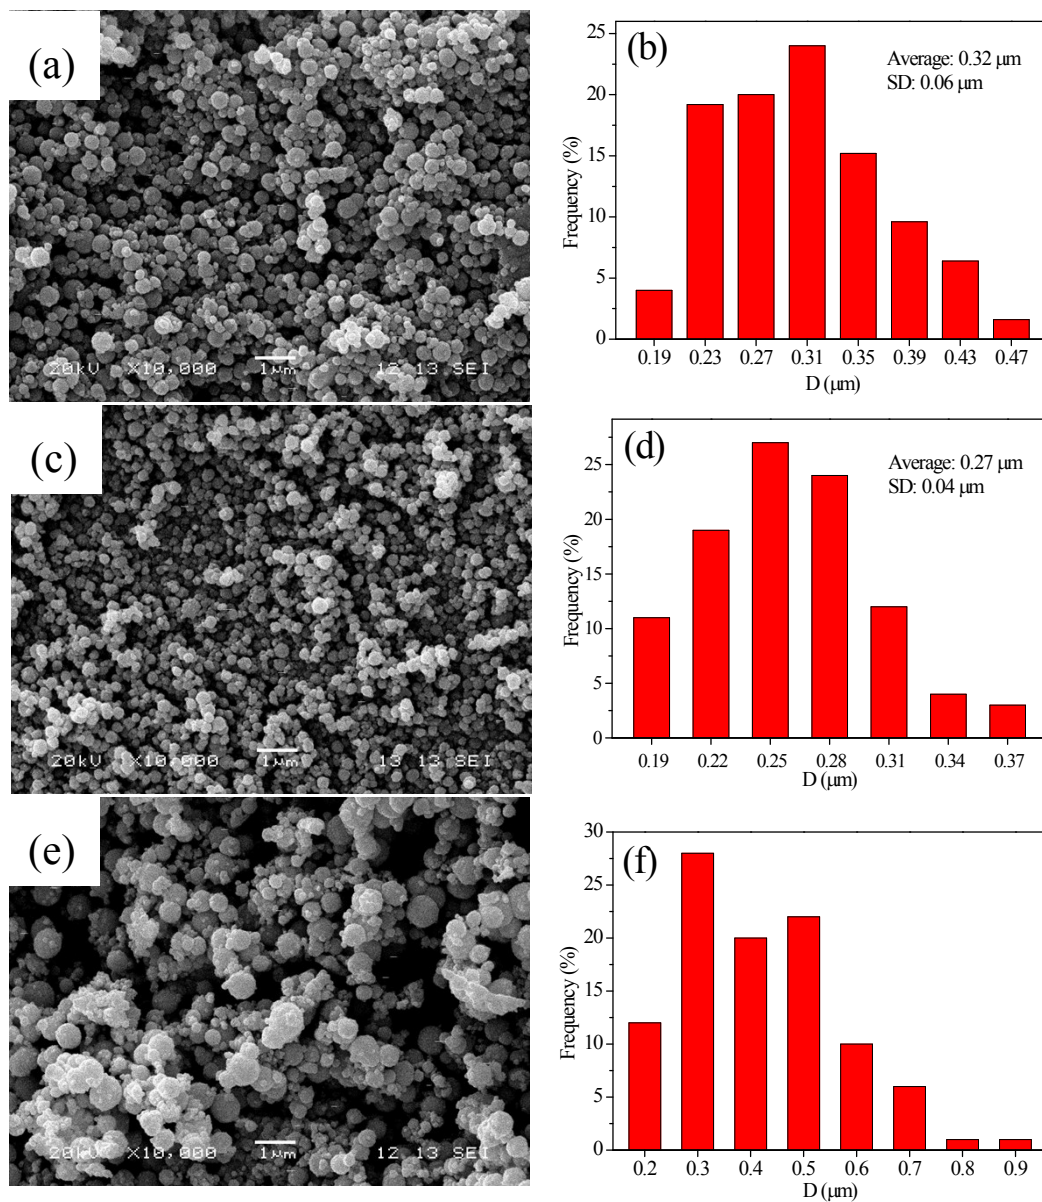

**Fig. S1** SEM images and corresponding particle size distribution histograms of Fe<sub>3</sub>O<sub>4</sub>-AC (a and b), Fe<sub>3</sub>O<sub>4</sub>-AN (c and d) and Fe<sub>3</sub>O<sub>4</sub>-AS (e and f).

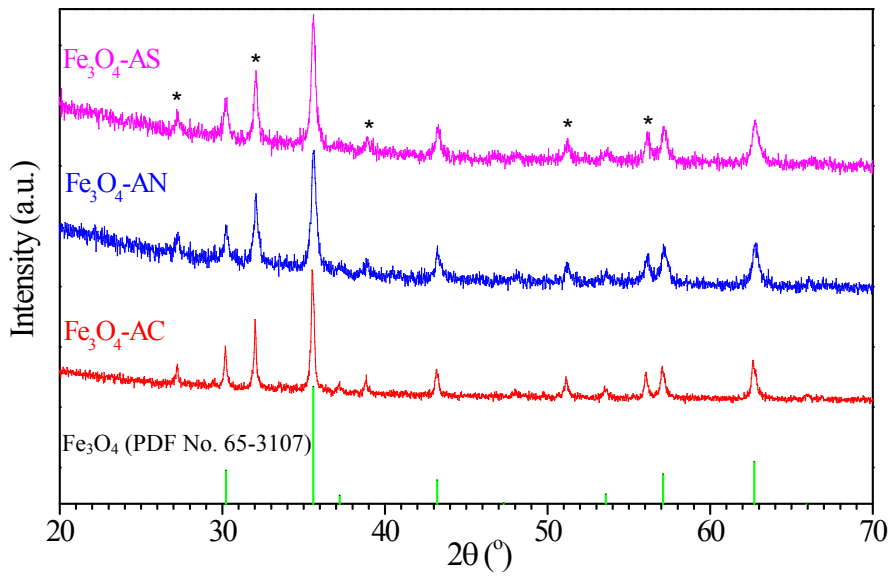

**Fig. S2** XRD patterns of  $\text{Fe}_3\text{O}_4\text{-AC}$ ,  $\text{Fe}_3\text{O}_4\text{-AN}$  and  $\text{Fe}_3\text{O}_4\text{-AS}$  samples. Asterisks indicate five unidentified peaks besides the diffraction peaks of  $\text{Fe}_3\text{O}_4$ .

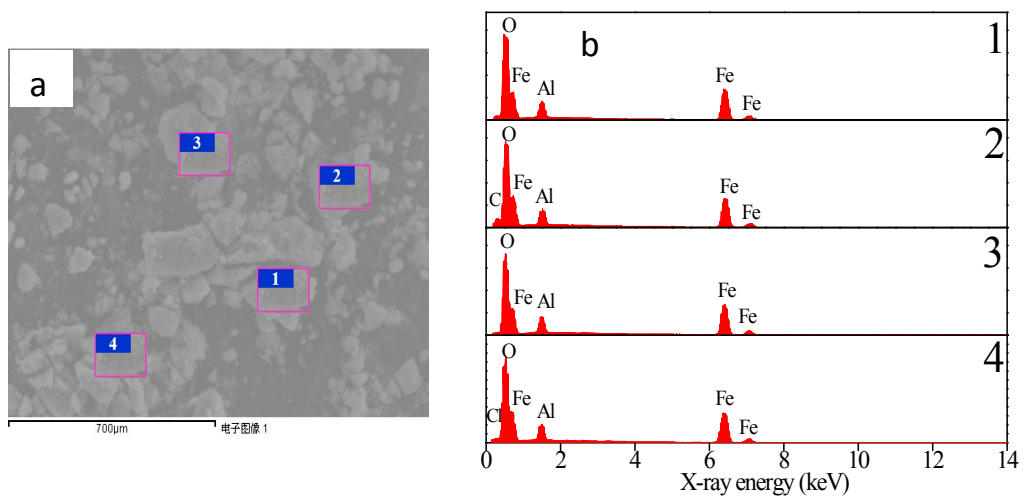

**Fig. S3** EDX analysis of  $\text{Fe}_3\text{O}_4\text{-AIP-5.53\%}$ . (a) Detection areas and (b) Corresponding EDX spectra.

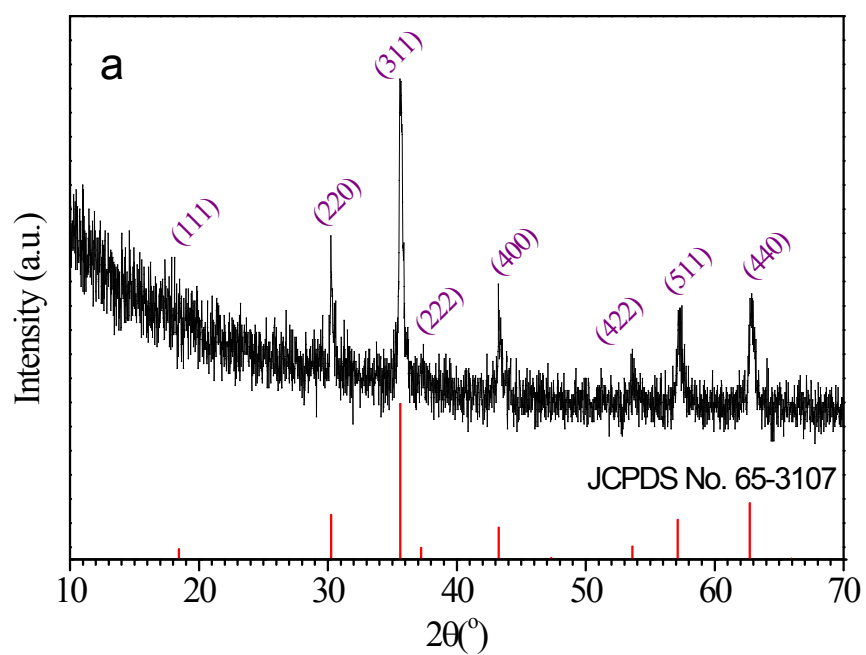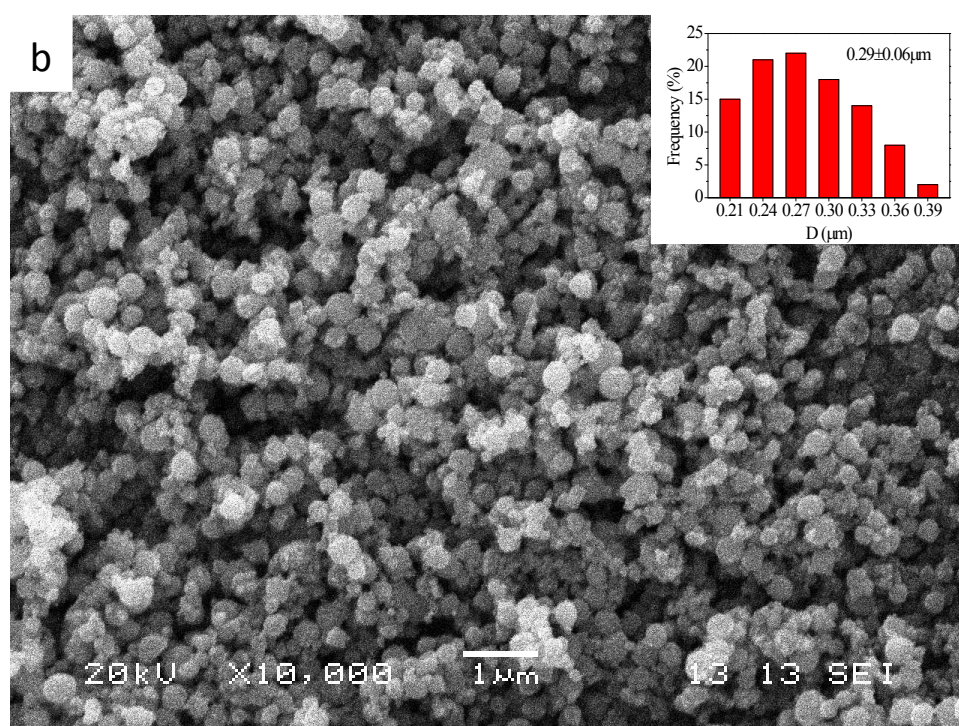

**Fig. S4** XRD (a) and SEM (b) of magnetically recovered  $\text{Fe}_3\text{O}_4$ -AIP-1.42% catalyst after the reaction at the first run.

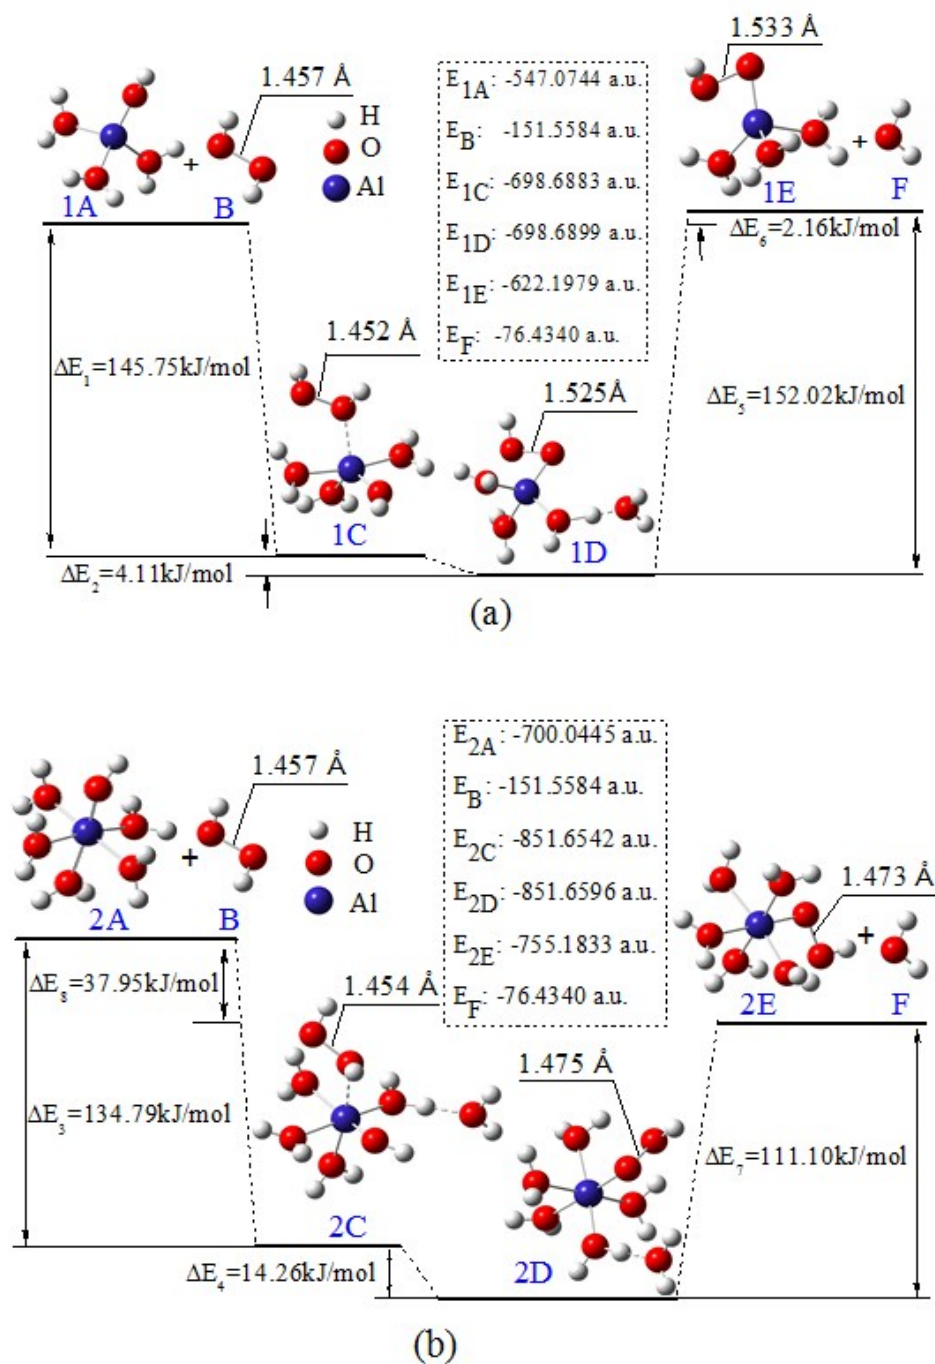

**Fig. S5** Energy diagrams calculated at B3LYP/6-31+G(d,p) level by DFT. (a) Energy changes during the interaction between  $[\text{Al}(\text{OH})(\text{H}_2\text{O})_3]^{2+}$  (1A) and  $\text{H}_2\text{O}_2$  (B); (b) Energy changes during the interaction between  $[\text{Al}(\text{OH})(\text{H}_2\text{O})_5]^{2+}$  (2A) and  $\text{H}_2\text{O}_2$  (B).
